# Supplementary material for: Gut Microbiota Dysbiosis-driven Bile Acid Dysfunction Alters Keratinocyte Lipid Metabolism via FXR-NQO1 Signaling in Psoriasis
Source: Research Square preprint supplement (doi:10.21203/rs.3.rs-6337099/v1), 2025-04-25
Supplement: Supplementary file 1 [file 320e4301c1a06bbc1a09d66e.pdf]

## **SUPPLEMENTARY INFORMATION**

**Lian et al. 2025**

Fig S1

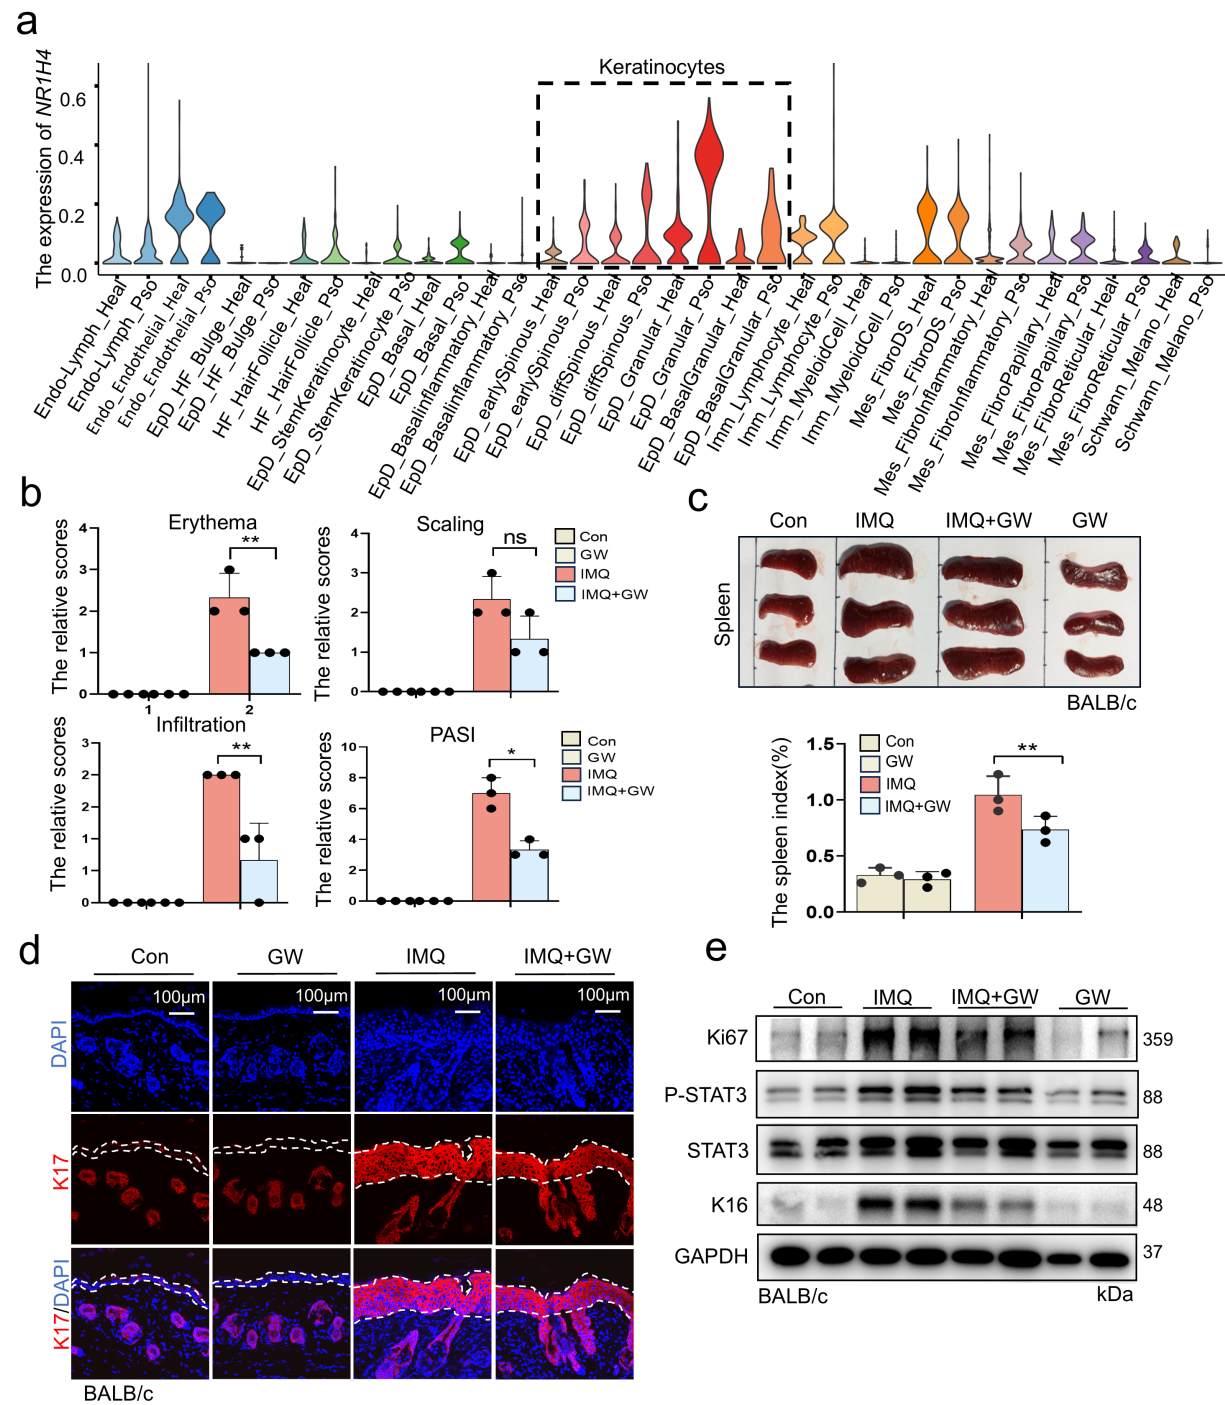

**Supplementary Figure 1. Disrupted serum bile acid profile in psoriasis patients and IMQ-induced mice.** **a.** scRNA-seq analysis showing *NR1H4* expression in various skin cells in psoriasis patients. **b.** PASI scores accessing the erythema, scaling, and infiltration on dorsal skin from control and IMQ-induced mice with or without GW treatment ( $n = 3$ ). **c.** Macroscopic appearance of spleen and the spleen index in from control and IMQ-induced mice with or without GW treatment ( $n = 3$ ). **d.** IF staining of K17 in dorsal lesions of control and IMQ-induced mice with or without GW treatment. **e.** Western blot of Ki67, K16, P-STAT3, and STAT3 in dorsal lesions from control and IMQ-induced mice with or without GW treatment. The data are presented as the mean  $\pm$  SD. \* $p < 0.05$ , \*\* $p < 0.01$ , \*\*\* $p < 0.001$ , \*\*\*\* $p < 0.0001$ .

Fig S2

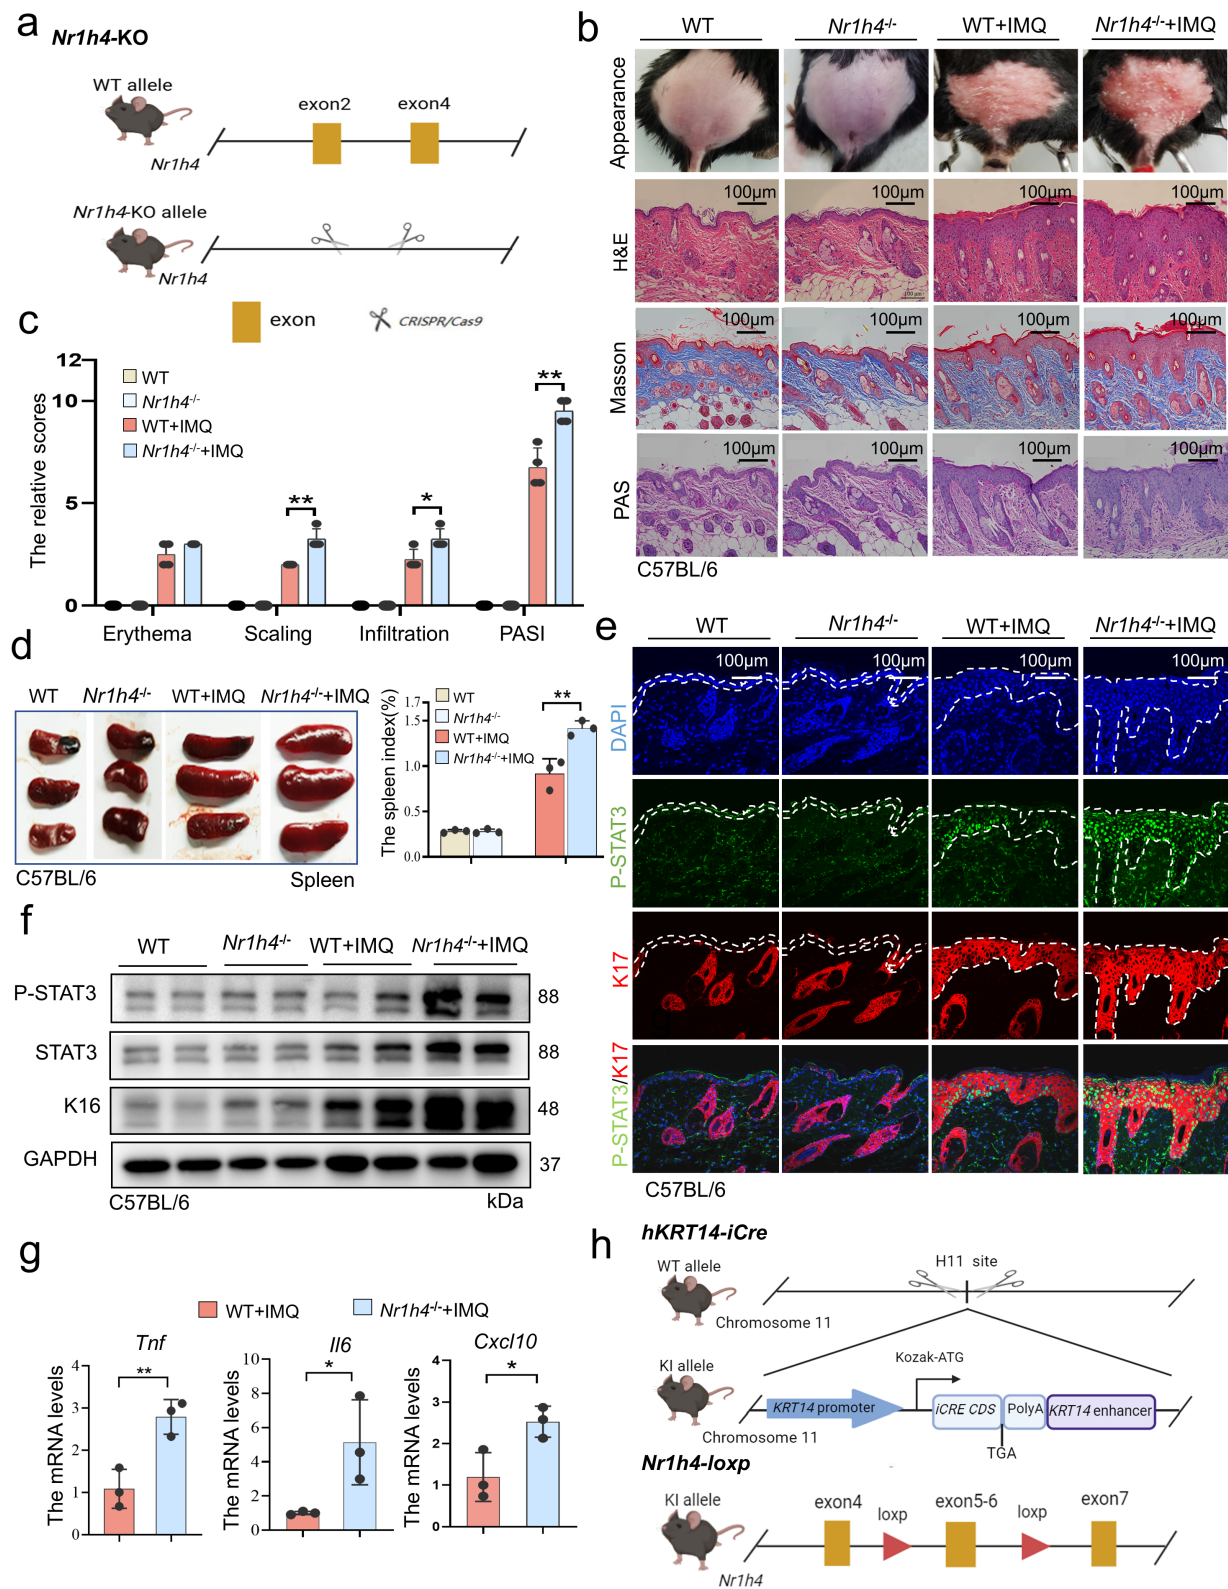



**Supplementary Figure 2. Systemic *Nr1h4* knockout aggravates the IMQ-induced psoriatic lesions in Mice.** **a.** Schematic illustration showing the strategy of constructing systemic *Nr1h4* knockout mice **b.** Representative images and histological staining (H&E staining, Masson's trichrome, and PAS) of dorsal skin from WT and *Nr1h4*-KO mice with or without IMQ treatment. **c.** PASI scores accessing the erythema, scaling, and infiltration in IMQ-induced mice ( $n = 3$ ). **d.** Macroscopic appearance of spleen and the spleen index in WT and *Nr1h4*-KO mice with or without IMQ treatment ( $n = 3$ ). **e.** IF staining of K17 and P-STAT3 in dorsal lesions from WT and *Nr1h4*-KO mice with or without IMQ treatment. **f.** Western blot of K16, P-STAT3, and STAT3 in dorsal lesions of WT and *Nr1h4*-KO mice with or without IMQ treatment. **g.** qRT-PCR analyzing key psoriasis-associated inflammatory mediators (*Tnf*, *Il6*, and *Cxcl10*) in dorsal skin of IMQ-induced WT and *Nr1h4*-KO mice ( $n = 3$ ). **h.** Schematic illustration showing the strategy of constructing *KRT14-Cre* mice and *Nr1h4*<sup>loxP/loxP</sup> mice. The data are presented as the mean  $\pm$  SD. \* $p < 0.05$ , \*\* $p < 0.01$ , \*\*\* $p < 0.001$ , \*\*\*\* $p < 0.0001$ .

Fig S3

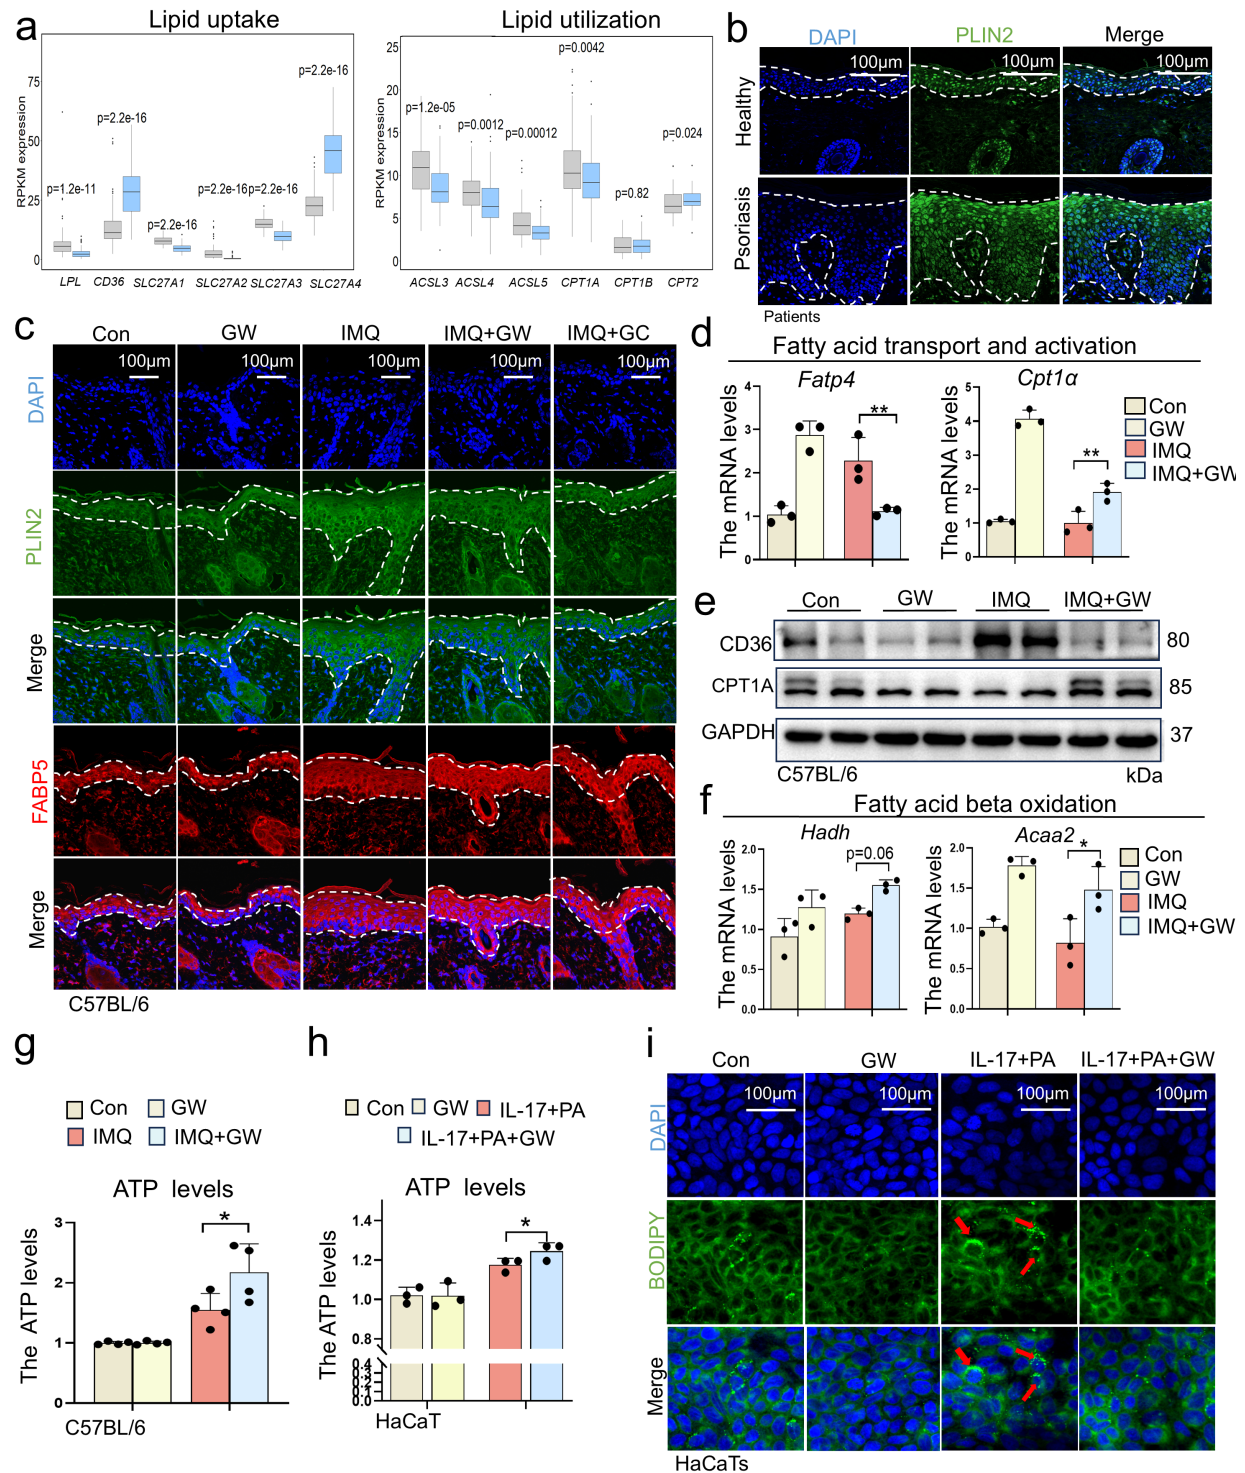

**Supplementary Figure 3. FXR activation ameliorates psoriatic lesions through decreasing keratinocyte lipid accumulation.** **a.** RPKM values of genes associated with lipid uptake and lipid utilization in psoriatic skin from GEO database (GSE54456). **b.** IF staining of PLIN2 in psoriatic lesions and healthy skin. **c.** IF staining of PLIN2 and FABP5 in the dorsal skin of control, IMQ-treated, and IMQ-treated mice with GC or GW treatment. **d.** qRT-PCR analyzing of key genes associated with fatty acid transport and activation (*Fatp4*, *Cpt1a*) in dorsal lesions of mice ( $n = 3$ ). **e.** Western blot of CD36 and CPT1A in the dorsal lesions of control, IMQ-treated, and IMQ-treated mice with GC or GW. **f.** qRT-PCR analyzing of key genes associated with fatty acid beta oxidation (*Hadh*, *Ehhadh*, *Acaa2*) in dorsal lesions of mice ( $n = 3$ ). **g.** ATP analysis of dorsal skin of control, IMQ-treated, and IMQ-treated mice with GW treatment ( $n = 4$ ). **h.** ATP analysis of IL-17- and PA-induced HaCaTs with GW treatment ( $n = 3$ ). **i.** BODIPY staining showing lipid droplets in IL-17- and PA-induced HaCaTs with GW treatment. The data are presented as the mean  $\pm$  SD.  $*p < 0.05$ ,  $**p < 0.01$ ,  $***p < 0.001$ ,  $****p < 0.0001$ .

**Fig S4**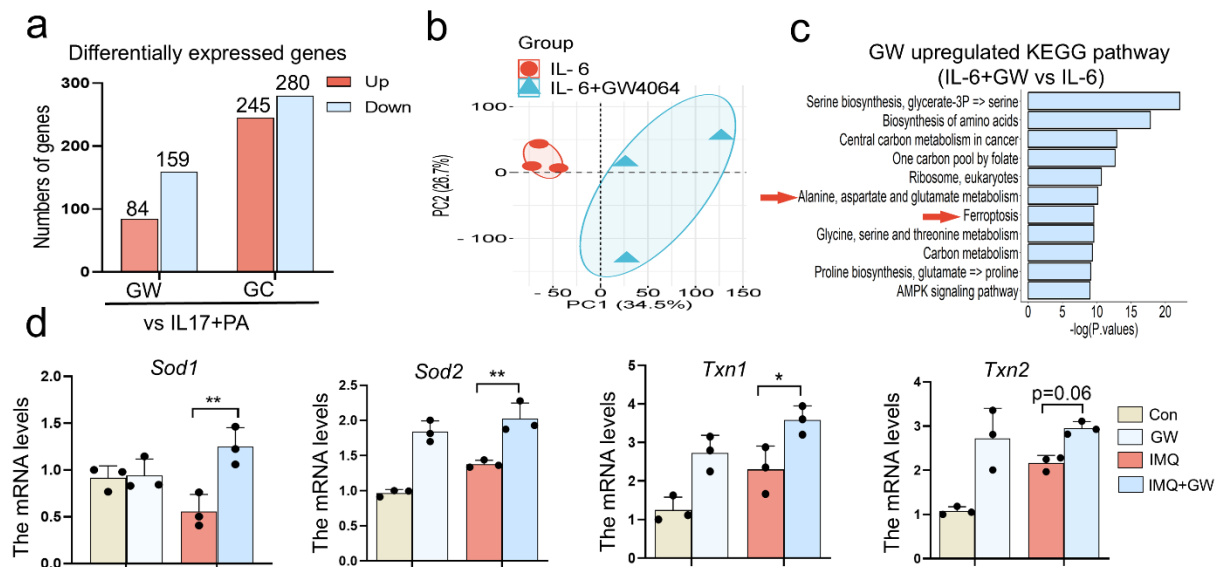**Supplementary Figure 4. FXR upregulates NQO1 expression to enhance antioxidative ability.**

**a.** Bar-chart showing differentially expressed genes (DEGs) in IL-17/PA-induced HaCaTs with GW or GC treatment. **b.** PCA plot of RNA sequencing in IL-6-induced HaCaTs with GW treatment ( $n = 3$ ). **c.** KEGG enrichment analysis of upregulated genes in in IL-6-induced HaCaTs treated with GW. **d.** RT-PCR analyzing of the antioxidative genes (*Sod1*, *Sod2*, *Txn1*, *Txn2*) in dorsal skin of IMQ-induced mice with GW treatment. The data are presented as the mean  $\pm$  SD. \* $p < 0.05$ , \*\* $p < 0.01$ , \*\*\* $p < 0.001$ , \*\*\*\* $p < 0.0001$ .

**Fig S5**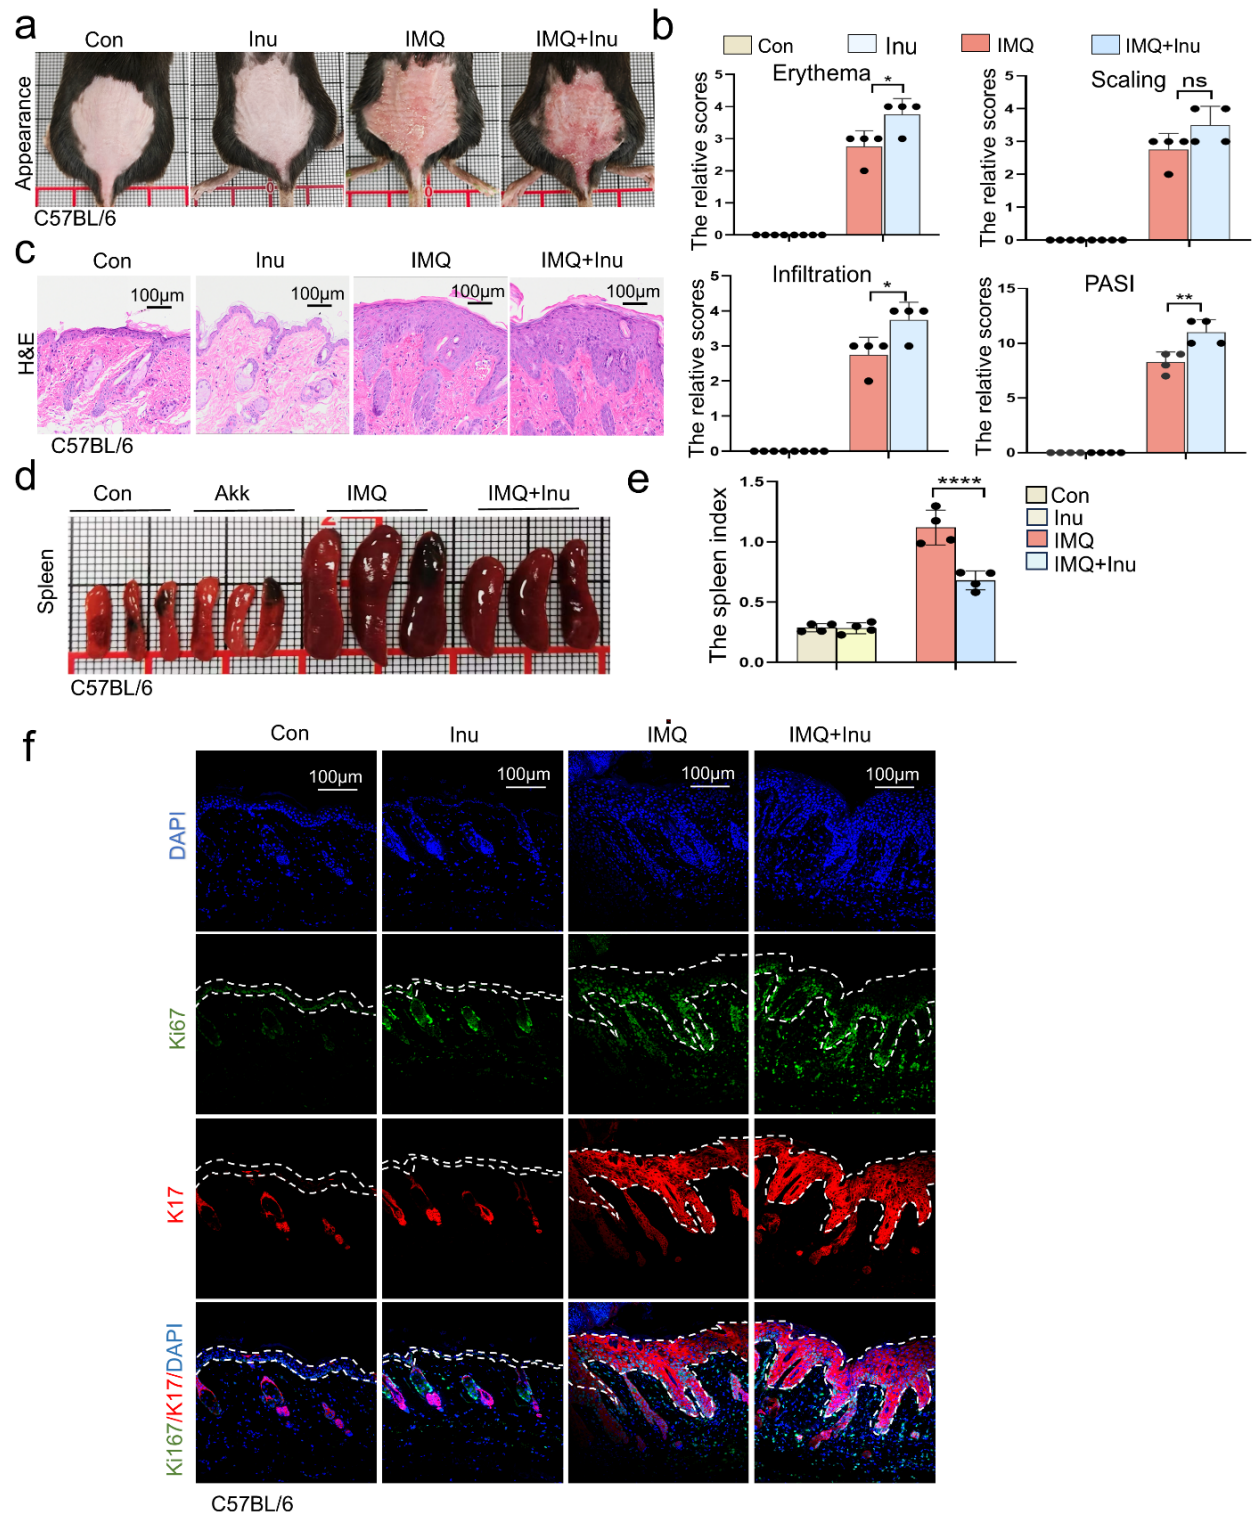

**Supplementary Figure 5. Inulin feeding exacerbates IMQ-induced psoriatic lesions in mice.**

**a.** Macroscopic images of dorsal skin from control and IMQ-induced mice with or without inulin (inu) treatment. **b.** PASI scores assessing the erythema, scaling, and infiltration on dorsal skin from control and IMQ-induced mice with or without inu treatment ( $n = 4$ ). **c.** Histological H&E staining of dorsal skin from control and IMQ-induced mice with or without inu treatment. **d-e.** Macroscopic images of spleen and the spleen index in control and IMQ-induced mice with or without inu treatment ( $n = 4$ ). **f.** IF staining of K17 and Ki67 in the dorsal lesions of control and IMQ-induced mice with or without GW treatment. The data are presented as the mean  $\pm$  SD.  $*p < 0.05$ ,  $**p < 0.01$ ,  $***p < 0.001$ ,  $****p < 0.0001$ .



**Supplementary table 1: Primers used in this study**

| RT-qPCR primers                      | Forward Primer (5'-3')      | Reverse Primer (5'-3')  |
|--------------------------------------|-----------------------------|-------------------------|
| <b>Mouse</b>                         |                             |                         |
| <i>Il6</i>                           | TAGTCCTTCCTACCCCAATTTCC     | TTGGTCCTTAGCCACTCCTTC   |
| <i>Cxcl10</i>                        | ATGAGTTTTTCCCTTATGGGGAC     | GCTGGAAGTTGGACACCTCAA   |
| <i>Il17a</i>                         | TGACCCCTAAGAAACCCCA         | TCATTGTGGAGGGCAGACAA    |
| <i>Il1b</i>                          | GCAACTGTTCTGAACTCAACT       | ATCTTTTGGGGTCCGTCAACT   |
| <i>Tnf</i>                           | CAGGCGGTGCCTATGTCTC         | CGATCACCCGAAGTTCAGTAG   |
| <i>S100a9</i>                        | ACTCTTAGCCTTGAAGAGCAAG      | TTCTTGCTCAGGGTGTCAAG    |
| <i>Il23</i>                          | CAAAGGATCCGCCAAGGTCT        | GGAGGTGTGAAGTTGCTCCA    |
| <i>Fatp4</i>                         | GATGAAGACCCGGATGAAACG       | GATGAAGACCCGGATGAAACG   |
| <i>Cpt1a</i>                         | CTCCGCCTGAGCCATGAAG         | CACCAGTGATGATGCCATTCT   |
| <i>Hadh</i>                          | TCAAGCATGTGACCGTCATCG       | TGGATTTTGCCAGGATGTCTTC  |
| <i>Acaa2</i>                         | CTGCTACGAGGTGTGTTTCATC      | AGCTCTGCATGACATTGCCC    |
| <i>Sod1</i>                          | AACCAGTTGTGTTGTCAGGAC       | CCACCATGTTTCTTAGAGTGAGG |
| <i>Sod2</i>                          | CAGACCTGCCTTACGACTATGG      | CTCGGTGGCGTTGAGATTGTT   |
| <i>Txn1</i>                          | CATGCCGACCTTCCAGTTTTA       | TTTCCTTGTTAGCACCGGAGA   |
| <i>Txn2</i>                          | TGGGCTTCCCTCACCTCTAAG       | CCTGGACGTTAAAGGTCGTCA   |
| <b>Human</b>                         |                             |                         |
| <i>SLC7A11</i>                       | TGCAGTGGCAGTGACCTTTT        | AAGCAGGAGAGGGCAACAAA    |
| <i>NQO1</i>                          | CCTTGTGATATTCCAGAGTGGCA     | CCAGGCGTTTCTTCCATCCT    |
| Primers for<br><i>Nr1h4</i> -KO mice | Forward Primer (5'-3')      | Reverse Primer (5'-3')  |
| <i>K14_Cre_KI</i>                    | ATATCCCCTTGTTCCCTTTCTGC     | ATATCCCCTTGTTCCCTTTCTGC |
| <i>K14_Cre_WT</i>                    | CAGCAAAACCTGGCTGTGGATC      | ATGAGCCACCATGTGGGTGTC   |
| <i>Nr1h4_Floxp</i>                   | TGTAGGCTTCTAGGTGTTGGC       | ACCCTTCACATGGTGGGAGAT   |
| <i>Nr1h4_KO</i>                      | GGCTATTAGAGTTTTAAGTGCTGGAGG | GCTGTTCCTCACTCTGTCTTTAG |
| <i>Nr1h4_WT</i>                      | CTTCCGAAGAAGCATTACCAAG      | CGTCCGACATAGCTCATTAAAGC |
| <i>NQO1</i> siRNA                    | Forward Primer (5'-3')      | Reverse Primer (5'-3')  |
| <i>NQO1</i>                          | UAUAUGUCAGUUGAGGUUCUU       | UAUAUGUCAGUUGAGGUUCUU   |
| Scramble                             | UUCUCCGAACGUGUCACGU         | ACGUGACACGUUCGGAGAA     |
| ChIP-qPCR                            | Forward Primer (5'-3')      | Reverse Primer (5'-3')  |
| <i>NQO1_site1</i>                    | GAATAGCCAAAACGGGACCAG       | GTACAGACGGGGCTTCACCA    |
| <i>NQO1_site2</i>                    | TGGGTGACGAAGTGAGACTC        | CTTTTGCACTGGAGGGACAA    |
